# Supplementary material for: Diagnostic Accuracy of Quantitative Micro-Elastography for Margin Assessment in Breast-Conserving Surgery
Source: Oxford University Press journal article supplement (doi:10.1158/0008-5472.can-19-1240), 2020-04-15
Supplement: 00085472can191240-sup-220878_4_supp_6084233_q5zt98.zip [file 00085472can191240-sup-220878_4_supp_6084233_q5zt98.zip]

# CAN-19-240: Supplemental information – reader statistics

*Kelsey M. Kennedy*<sup>1,10</sup>  
*Renate Zilkens*<sup>1,2</sup>  
*Wes M. Allen*<sup>1,3</sup>  
*Ken Y. Foo*<sup>1,3</sup>  
*Qi Fang*<sup>1,3</sup>  
*Lixin Chin*<sup>1,3</sup>  
*Rowan W. Sanderson*<sup>1,3</sup>  
*James Anstie*<sup>1,3</sup>  
*Philip Wijesinghe*<sup>1,3,11</sup>  
*Andrea Curatolo*<sup>1,3,12</sup>  
*Hsern Ern I. Tan*<sup>2</sup>  
*Narelle Morin*<sup>4</sup>  
*Bindu Kunjuraman*<sup>5</sup>  
*Chris Yeomans*<sup>6</sup>  
*Synn Lynn Chin*<sup>5</sup>  
*Helen DeJong*<sup>1,7</sup>  
*Katharine Giles*<sup>8</sup>  
*Benjamin F. Dessauvagie*<sup>2,6</sup>  
*Bruce Latham*<sup>6</sup>  
*Christobel M. Saunders*<sup>2,5,9</sup>  
*Brendan F. Kennedy*<sup>1,3</sup>

<sup>1</sup> BRITelab, Harry Perkins Institute of Medical Research, QEII Medical Centre, Nedlands, and Centre for Medical Research, The University of Western Australia, Perth, Australia

<sup>2</sup> School of Medicine, The University of Western Australia, Perth, Australia

<sup>3</sup> Department of Electrical, Electronic & Computer Engineering, School of Engineering, The University of Western Australia, Perth, Australia

<sup>4</sup> Sonowest, Perth, Australia

<sup>5</sup> Breast Centre, Fiona Stanley Hospital, Murdoch, Australia

<sup>6</sup> PathWest, Fiona Stanley Hospital, Murdoch, Australia

<sup>7</sup> School of Medical and Health Sciences, Edith Cowan University, Joondalup, Australia

<sup>8</sup> OncoRes Medical, Perth, Australia

<sup>9</sup> Breast Clinic, Royal Perth Hospital, Perth, Australia

<sup>10</sup> Current affiliation - Department of Biomedical Engineering, Columbia University, New York, NY

<sup>11</sup> Current affiliation - School of Physics and Astronomy, University of St Andrews, United Kingdom

<sup>12</sup> Current affiliation - VioBio, Instituto de Óptica “Daza de Valdés”, Consejo Superior de Investigaciones Científicas (IO, CSIC), Madrid, Spain

Document generated using: R -e "rmarkdown::render('CAN-19-1240\_Supplemental\_Reader\_Stats.Rmd', 'all', encoding='UTF-8')"

For formatting the output data tables, we use the `kable` function in the `knitr` library . For inter-reader variability, we use the `kappam.fleiss` function in the `irr` library, version 0.84, obtained from CRAN. For conditional formatting of table entries (highlighting *p*-values), we use the `format_table` function in the `formattable` library, version 0.2.0.1, obtained from CRAN.

```
library("knitr")
#install.packages("irr", lib = "./lib")
#library(lpSolve, lib.loc = "./lib")
#library(irr, lib.loc = "./lib")
source("./lib/kappam.fleiss.R")
source("./lib/print.irrlist.R")
#install.packages("formattable", lib = "./lib")
library(formattable, lib.loc = "./lib")
```

## 1 Raw reader data

Loaded from .csv files. Each with column “ROI\_id”, “OCT”, “QME”, “OCT\_QME”.

“Truth” contains “ROI\_id”, and “Involved”, and is a record of the histopathology report for each sample.

“QME\_Auto” contains “ROI\_id” and “QME”, and holds the results of a preliminary automated classification based on the QME elasticity values.

```
Truth <- read.csv(file = "reader-results-truth.csv", header = TRUE)

Eng1 <- read.csv(file = "reader-eng1.csv", header = TRUE)
Eng2 <- read.csv(file = "reader-eng2.csv", header = TRUE)
Surg1 <- read.csv(file = "reader-surg1.csv", header = TRUE)
Surg2 <- read.csv(file = "reader-surg2.csv", header = TRUE)
Path <- read.csv(file = "reader-path.csv", header = TRUE)
Res <- read.csv(file = "reader-res.csv", header = TRUE)
Sonog <- read.csv(file = "reader-sonog.csv", header = TRUE)

readers <- list(Eng1, Eng2, Surg1, Surg2, Path, Res, Sonog)
reader_names <- c("Eng 1", "Eng 2", "Surg 1", "Surg 2", "Path", "Res", "Sonog")

QME_Auto <- read.csv(file = "reader-auto.csv", header = TRUE)
auto_readers <- list(QME_Auto)
auto_reader_names <- c("QME_Auto")
```

## 2 Methods

### 2.1 Confusion matrix

From the raw data, calculate the elements of the confusion matrix, True/False Positive/Negative.

```
tp_tn_fp_fn <- function(
  truth, readers, reader_names, class=c("OCT", "QME", "OCT_QME")
) {
  # Assemble the dataframe
  d_frame <- data.frame(
    # Names of the readers
    reader = reader_names,
    # True positives
    tp = sapply(readers,
      function(r) sum(truth$Involved == "Positive" & r[, class] == "Cancer")),
    # True negatives
    tn = sapply(readers,
      function(r) sum(truth$Involved == "Negative" & r[, class] == "Not cancer")),
```

```

# False positives
fp = sapply(readers,
  function(r) sum(truth$Involved == "Negative" & r[, class] == "Cancer")),
# False negatives
fn = sapply(readers,
  function(r) sum(truth$Involved == "Positive" & r[, class] == "Not cancer"))
)
# Calculates the aggregate data and returns the combined data frame.
if (nrow(d_frame) > 1) {
  agg_frame <- data.frame(
    reader = c("Aggregate"),
    tp = sum(d_frame$tp), tn = sum(d_frame$tn),
    fp = sum(d_frame$fp), fn = sum(d_frame$fn)
  )
  all_frame <- rbind(d_frame, agg_frame)
} else {
  all_frame <- d_frame
}
return(all_frame)
}

```

## 2.2 Confidence interval estimation

There are many ways to estimate confidence interval (1,2). In medical statistics, this is most commonly given by the “Wald” interval (2,3). For a sample probability  $\hat{p} = m/n$ , and  $100(1 - \alpha)\%$  confidence interval, the Wald interval is given by:

$$\hat{p} \pm z_{\alpha/2} \sqrt{\hat{p}(1 - \hat{p})/n}. \quad (1)$$

```

#' Calculates and formats a probability and confidence interval for display as
#' percentages
wald_p_ci <- function(m, n, alpha=0.05) {
  p <- m / n
  Za2 <- qnorm(1 - alpha / 2)
  ci <- Za2 * sqrt(p * (1 - p) / n)
  disp_p_ci <- sprintf("%2.1f±%2.1f%%", p * 100, ci * 100)
  return(disp_p_ci)
}

#' Calculate the sensitivity, specificity, positive/negative predictive
#' values and overall accuracy of the diagnostic assessments, with
#' associated 95% confidence intervals.
diagnostic_acc <- function(tp_tn_fp_fn, p_ci_fun) {
  res <- data.frame(
    reader = tp_tn_fp_fn$reader,
    sens = p_ci_fun(tp_tn_fp_fn$tp, tp_tn_fp_fn$tp + tp_tn_fp_fn$fn),
    spec = p_ci_fun(tp_tn_fp_fn$tn, tp_tn_fp_fn$tn + tp_tn_fp_fn$fp),
    ppv = p_ci_fun(tp_tn_fp_fn$tp, tp_tn_fp_fn$tp + tp_tn_fp_fn$fp),
    npv = p_ci_fun(tp_tn_fp_fn$tn, tp_tn_fp_fn$tn + tp_tn_fp_fn$fn),
    acc = p_ci_fun(
      tp_tn_fp_fn$tp + tp_tn_fp_fn$tn,
      tp_tn_fp_fn$tp + tp_tn_fp_fn$tn + tp_tn_fp_fn$fp + tp_tn_fp_fn$fn)
  )
  return(res)
}

```

## 2.3 Inter-reader variability

There are several methods for measuring the variability between raters/readers of diagnostic data (4). For our study, we use Fleiss' kappa (5), which provides a measure for the agreement or disagreement of  $m$  readers assigning  $n$  subjects into  $k$  categories.

Kappa can be interpreted using the categories proposed by Landis and Koch (6):

| Kappa     | Interpretation |
|-----------|----------------|
| <0.00     | Poor           |
| 0.00-0.20 | Slight         |
| 0.21-0.40 | Fair           |
| 0.41-0.60 | Moderate       |
| 0.61-0.80 | Substantial    |
| 0.81-1.00 | Almost perfect |

```
#' Generate a matrix with reader classifications in the columns, subjects in
#' the rows, of the classification results from reading using 'class' data,
#' e.g.,
#' | 1_OCT      | 2_OCT      | ... |
#' | ----- | ----- | --- |
#' | Cancer    | Not cancer | ... |
#' | Not cancer | Not cancer | ... |
#'
#' NOTE that 'truth' is only used here for merging the reader results,
#' as the inter-reader variability is concerned with consistency between
#' readers, not their accuracy
cat_matrix <- function(truth, readers, class=c("OCT", "QME", "OCT_QME")) {
  m <- truth[, "ROI_id", drop = FALSE]
  idx <- 1
  for (r in readers) {
    tmp <- r[, c("ROI_id", class)]
    # Rename e.g., "OCT" of "Eng1" -> "1_OCT"
    # "OCT" of "Surg1" -> "2_OCT" etc
    colnames(tmp) <- c("ROI_id", paste(idx, class, sep = "_"))
    idx <- idx + 1
    # Merge the data to ensure every reader's classification of, e.g., ROIxyz
    # is in the same row
    m <- merge(m, tmp, by = "ROI_id")
  }
  # Remove the ROI_id column, it's now implicit, and also not a reader
  m <- m[, !(names(m) %in% "ROI_id")]
  return(m)
}
```

## 2.4 Significance of OCT vs. QME, and OCT vs. OCT+QME

In order to establish the statistical significance of the QME, and OCT+QME, results as compared to the OCT results, we use McNemar's test. McNemar's test is a widely used tool for comparing the performance of two diagnostic tests in terms of sensitivities and specificities (7).

```
#' Use MacNemar's test to find the p-values for the data in confusion matrix 1
#' vs confusion matrix 2
diagnostic_significance <- function(CM1, CM2) {
```

```

sens_p <- NULL
spec_p <- NULL
acc_p <- NULL
for (r in CM1$reader) {
  # Construct the 2x2 contingency table for sensitivity, specificity,
  # and accuracy for both CM1 and CM2
  #
  # E.g.,
  # |      | CM1 | CM2 |
  # | tp | 15 | 24 |
  # | fn | 9  | 0  |
  #
  # Sensitivity: ratio between TP and FN
  sens_contin <- matrix(
    c(CM1[CM1$reader == r, "tp"], CM1[CM1$reader == r, "fn"],
      CM2[CM2$reader == r, "tp"], CM2[CM2$reader == r, "fn"]),
    nrow=2, ncol=2, dimnames=list(c("tp", "fn"), c("CM1", "CM2")))
  # Specificity: ratio between TN and FP
  spec_contin <- matrix(
    c(CM1[CM1$reader == r, "tn"], CM1[CM1$reader == r, "fp"],
      CM2[CM2$reader == r, "tn"], CM2[CM2$reader == r, "fp"]),
    nrow=2, ncol=2, dimnames=list(c("tn", "fp"), c("CM1", "CM2")))
  # Accuracy: Ratio between true and false
  cm1_true <- CM1[CM1$reader == r, "tp"] + CM1[CM1$reader == r, "tn"]
  cm1_false <- CM1[CM1$reader == r, "fp"] + CM1[CM1$reader == r, "fn"]
  cm2_true <- CM2[CM2$reader == r, "tp"] + CM2[CM2$reader == r, "tn"]
  cm2_false <- CM2[CM2$reader == r, "fp"] + CM2[CM2$reader == r, "fn"]
  acc_contin <- matrix( c(cm1_true, cm1_false, cm2_true, cm2_false),
    nrow=2, ncol=2, dimnames=list(c("t", "f"), c("CM1", "CM2")))
  # Calculate the corresponding p-values using Fischer's exact test
  sens_p <- append(sens_p, mcnemar.test(sens_contin)$p.value)
  spec_p <- append(spec_p, mcnemar.test(spec_contin)$p.value)
  acc_p <- append(acc_p, mcnemar.test(acc_contin)$p.value)
}
cm1_cm2_p_vals <- data.frame(
  reader = CM1$reader,
  sens_p = sens_p,
  spec_p = spec_p,
  acc_p = acc_p
)
return(cm1_cm2_p_vals)
}

# Any field that fails the significance threshold of 0.05 is
# shown in bold text
p_val_sig_bold <- formatter(
  "span", x ~ ifelse(x <= 0.05, sprintf("%g", x), sprintf("***%g**", x))
)

```

### 3 Reader statistics

First, the number of positive/negative samples as reported from histopathology, along with an estimate of the percentage of involved (positive) samples.

```

num_positive <- sum(Truth$Involved == "Positive")
num_negative <- sum(Truth$Involved == "Negative")
num_samples <- num_positive + num_negative
samples <- data.frame(
  num_positive = num_positive,
  num_negative = num_negative,
  num_samples = num_samples,
  prevalence = wald_p_ci(num_positive, num_samples)
)
kable(samples, row.names = FALSE)

```

| num_positive | num_negative | num_samples | prevalence |
|--------------|--------------|-------------|------------|
| 24           | 130          | 154         | 15.6±5.7%  |

### 3.1 OCT only

Reader summary results using only the OCT images.

```
oct <- tp_tn_fp_fn(Truth, readers, reader_names, "OCT")
```

#### 3.1.1 Confidence intervals

```

oct_acc <- diagnostic_acc(oct, p_ci_fun = wald_p_ci)
oct_res <- merge(oct, oct_acc, by = "reader", sort = FALSE)
kable(oct_res, row.names = FALSE)

```

| reader    | tp  | tn  | fp  | fn | sens       | spec      | ppv        | npv       | acc       |
|-----------|-----|-----|-----|----|------------|-----------|------------|-----------|-----------|
| Eng 1     | 15  | 111 | 19  | 9  | 62.5±19.4% | 85.4±6.1% | 44.1±16.7% | 92.5±4.7% | 81.8±6.1% |
| Eng 2     | 17  | 113 | 17  | 7  | 70.8±18.2% | 86.9±5.8% | 50.0±16.8% | 94.2±4.2% | 84.4±5.7% |
| Surg 1    | 15  | 97  | 33  | 9  | 62.5±19.4% | 74.6±7.5% | 31.2±13.1% | 91.5±5.3% | 72.7±7.0% |
| Surg 2    | 16  | 94  | 36  | 8  | 66.7±18.9% | 72.3±7.7% | 30.8±12.5% | 92.2±5.2% | 71.4±7.1% |
| Path      | 16  | 109 | 21  | 8  | 66.7±18.9% | 83.8±6.3% | 43.2±16.0% | 93.2±4.6% | 81.2±6.2% |
| Res       | 19  | 97  | 33  | 5  | 79.2±16.2% | 74.6±7.5% | 36.5±13.1% | 95.1±4.2% | 75.3±6.8% |
| Sonog     | 18  | 98  | 32  | 6  | 75.0±17.3% | 75.4±7.4% | 36.0±13.3% | 94.2±4.5% | 75.3±6.8% |
| Aggregate | 116 | 719 | 191 | 52 | 69.0±7.0%  | 79.0±2.6% | 37.8±5.4%  | 93.3±1.8% | 77.5±2.5% |

#### 3.1.2 Inter-reader variability

```

oct_irr <- cat_matrix(Truth, readers, "OCT")
kappam.fleiss(oct_irr, detail = TRUE)

```

```

## Fleiss' Kappa for m Raters
##
## Subjects = 154
## Raters = 7
## Kappa = 0.487
##
## z = 27.7
## p-value = 0
##
## Kappa z p.value

```

```
## Cancer      0.487 27.688  0.000
## Not cancer  0.487 27.688  0.000
```

## 3.2 QME only

Summary data using only the elasticity (QME) results.

```
qme <- tp_tn_fp_fn(Truth, readers, reader_names, "QME")
```

### 3.2.1 Confidence intervals

```
qme_acc <- diagnostic_acc(qme, p_ci_fun = wald_p_ci)
qme_res <- merge(qme, qme_acc, by = "reader", sort = FALSE)
kable(qme_res, row.names = FALSE)
```

| reader    | tp  | tn  | fp | fn | sens       | spec      | ppv        | npv        | acc       |
|-----------|-----|-----|----|----|------------|-----------|------------|------------|-----------|
| Eng 1     | 24  | 127 | 3  | 0  | 100.0±0.0% | 97.7±2.6% | 88.9±11.9% | 100.0±0.0% | 98.1±2.2% |
| Eng 2     | 24  | 127 | 3  | 0  | 100.0±0.0% | 97.7±2.6% | 88.9±11.9% | 100.0±0.0% | 98.1±2.2% |
| Surg 1    | 18  | 115 | 15 | 6  | 75.0±17.3% | 88.5±5.5% | 54.5±17.0% | 95.0±3.9%  | 86.4±5.4% |
| Surg 2    | 23  | 127 | 3  | 1  | 95.8±8.0%  | 97.7±2.6% | 88.5±12.3% | 99.2±1.5%  | 97.4±2.5% |
| Path      | 23  | 127 | 3  | 1  | 95.8±8.0%  | 97.7±2.6% | 88.5±12.3% | 99.2±1.5%  | 97.4±2.5% |
| Res       | 21  | 127 | 3  | 3  | 87.5±13.2% | 97.7±2.6% | 87.5±13.2% | 97.7±2.6%  | 96.1±3.1% |
| Sonog     | 23  | 127 | 3  | 1  | 95.8±8.0%  | 97.7±2.6% | 88.5±12.3% | 99.2±1.5%  | 97.4±2.5% |
| Aggregate | 156 | 877 | 33 | 12 | 92.9±3.9%  | 96.4±1.2% | 82.5±5.4%  | 98.7±0.8%  | 95.8±1.2% |

### 3.2.2 Inter-reader variability

```
qme_irr <- cat_matrix(Truth, readers, "QME")
kappam.fleiss(qme_irr, detail = TRUE)
```

```
## Fleiss' Kappa for m Raters
##
## Subjects = 154
## Raters = 7
## Kappa = 0.835
##
## z = 47.5
## p-value = 0
##
## Kappa z p.value
## Cancer 0.835 47.504 0.000
## Not cancer 0.835 47.504 0.000
```

### 3.2.3 Significance vs. OCT

```
oct_qme_p <- diagnostic_significance(oct, qme)
format_table(oct_qme_p, list(
  sens_p = p_val_sig_bold, spec_p = p_val_sig_bold, acc_p = p_val_sig_bold),
  format = "markdown")
```

| reader | sens_p    | spec_p      | acc_p       |
|--------|-----------|-------------|-------------|
| Eng 1  | 0.0148061 | 8.33969e-19 | 7.60251e-20 |

| reader    | sens_p          | spec_p      | acc_p        |
|-----------|-----------------|-------------|--------------|
| Eng 2     | 0.00405714      | 1.053e-19   | 1.65512e-21  |
| Surg 1    | <b>0.123658</b> | 2.77279e-11 | 1.02206e-11  |
| Surg 2    | 0.011921        | 1.79763e-12 | 4.75187e-14  |
| Path      | 0.011921        | 6.08462e-18 | 2.98619e-19  |
| Res       | 0.00326372      | 1.94831e-13 | 1.32479e-15  |
| Sonog     | 0.00296711      | 9.00829e-14 | 5.70263e-16  |
| Aggregate | 9.214e-13       | 1.49994e-97 | 4.14447e-108 |

### 3.2.4 Automated classification results

```
qme_auto <- tp_tn_fp_fn(Truth, auto_readers, auto_reader_names, "QME")
auto_acc <- diagnostic_acc(qme_auto, p_ci_fun = wald_p_ci)
auto_res <- merge(qme_auto, auto_acc, by = "reader", sort = FALSE)
kable(auto_res, row.names = FALSE)
```

| reader   | tp | tn  | fp | fn | sens       | spec      | ppv        | npv        | acc       |
|----------|----|-----|----|----|------------|-----------|------------|------------|-----------|
| QME_Auto | 24 | 127 | 3  | 0  | 100.0±0.0% | 97.7±2.6% | 88.9±11.9% | 100.0±0.0% | 98.1±2.2% |

## 3.3 OCT + QME

Summary data using the combined OCT and elasticity (QME) results.

```
oct_qme <- tp_tn_fp_fn(Truth, readers, reader_names, "OCT_QME")
```

### 3.3.1 Confidence intervals

```
oct_qme_acc <- diagnostic_acc(oct_qme, p_ci_fun = wald_p_ci)
oct_qme_res <- merge(oct_qme, oct_qme_acc, by = "reader", sort = FALSE)
kable(oct_qme_res, row.names = FALSE)
```

| reader    | tp  | tn  | fp | fn | sens       | spec       | ppv        | npv       | acc       |
|-----------|-----|-----|----|----|------------|------------|------------|-----------|-----------|
| Eng 1     | 21  | 130 | 0  | 3  | 87.5±13.2% | 100.0±0.0% | 100.0±0.0% | 97.7±2.5% | 98.1±2.2% |
| Eng 2     | 21  | 130 | 0  | 3  | 87.5±13.2% | 100.0±0.0% | 100.0±0.0% | 97.7±2.5% | 98.1±2.2% |
| Surg 1    | 17  | 126 | 4  | 7  | 70.8±18.2% | 96.9±3.0%  | 81.0±16.8% | 94.7±3.8% | 92.9±4.1% |
| Surg 2    | 23  | 130 | 0  | 1  | 95.8±8.0%  | 100.0±0.0% | 100.0±0.0% | 99.2±1.5% | 99.4±1.3% |
| Path      | 17  | 130 | 0  | 7  | 70.8±18.2% | 100.0±0.0% | 100.0±0.0% | 94.9±3.7% | 95.5±3.3% |
| Res       | 16  | 129 | 1  | 8  | 66.7±18.9% | 99.2±1.5%  | 94.1±11.2% | 94.2±3.9% | 94.2±3.7% |
| Sonog     | 20  | 130 | 0  | 4  | 83.3±14.9% | 100.0±0.0% | 100.0±0.0% | 97.0±2.9% | 97.4±2.5% |
| Aggregate | 135 | 905 | 5  | 33 | 80.4±6.0%  | 99.5±0.5%  | 96.4±3.1%  | 96.5±1.2% | 96.5±1.1% |

### 3.3.2 Inter-reader variability

```
oct_qme_irr <- cat_matrix(Truth, readers, "OCT_QME")
kappam.fleiss(oct_qme_irr, detail = TRUE)
```

```
## Fleiss' Kappa for m Raters
##
## Subjects = 154
## Raters = 7
```



```
##      Kappa = 0.814
##
##      z = 46.3
##      p-value = 0
##
##      Kappa      z p.value
## Cancer      0.814 46.287   0.000
## Not cancer  0.814 46.287   0.000
```

### 3.3.3 Significance vs. OCT

```
oct_oct_qme_p <- diagnostic_significance(oct, oct_qme)
format_table(oct_oct_qme_p, list(
  sens_p = p_val_sig_bold, spec_p = p_val_sig_bold, acc_p = p_val_sig_bold),
  format = "markdown")
```

| reader    | sens_p          | spec_p       | acc_p        |
|-----------|-----------------|--------------|--------------|
| Eng 1     | 0.0446097       | 2.03162e-19  | 7.60251e-20  |
| Eng 2     | 0.0140193       | 2.52078e-20  | 1.65512e-21  |
| Surg 1    | <b>0.169811</b> | 2.96285e-13  | 1.95049e-13  |
| Surg 2    | 0.011921        | 5.26802e-13  | 1.41847e-14  |
| Path      | <b>0.109599</b> | 1.51011e-18  | 1.15273e-18  |
| Res       | 0.0290963       | 8.39952e-14  | 4.66069e-15  |
| Sonog     | 0.0107874       | 2.5164e-14   | 5.70263e-16  |
| Aggregate | 2.01698e-09     | 7.01741e-103 | 2.06542e-109 |

## References

1. Agresti A, Coull BA. Approximate is better than “exact” for interval estimation of binomial proportions. *The American Statistician*. 1998;52:119–26.
2. Brown LD, Cai TT, DasGupta A. Interval estimation for a binomial proportion. *Statistical Science*. 2001;16:101–33.
3. Hess AS, Shardell M, Johnson JK, Thom KA, Strassle P, Netzer G, et al. Methods and recommendations for evaluating and reporting a new diagnostic test. *European Journal of Clinical Microbiology & Infectious Diseases*. 2012;31:2111–6.
4. Gisev N, Bell JS, Chen TF. Interrater agreement and interrater reliability: Key concepts, approaches, and applications. *Research in Social and Administrative Pharmacy*. 2013;9:330–8.
5. Fleiss JL. Measuring nominal scale agreement among many raters. *Psychological Bulletin*. 1971;76:378–82.
6. Landis JR, Koch GG. The measurement of observer agreement for categorical data. *Biometrics*. 1977;33:159–74.
7. Kim S, Lee W. Does McNemar’s test compare the sensitivities and specificities of two diagnostic tests? *Statistical Methods in Medical Research*. 2017;26:142–54.
